# Supplementary material for: In Silico Discovery of Potential Uridine-Cytidine Kinase 2 Inhibitors from the Rhizome of Alpinia mutica
Source: MDPI journal article supplement (doi:10.3390/molecules21040417), 2016-04-08

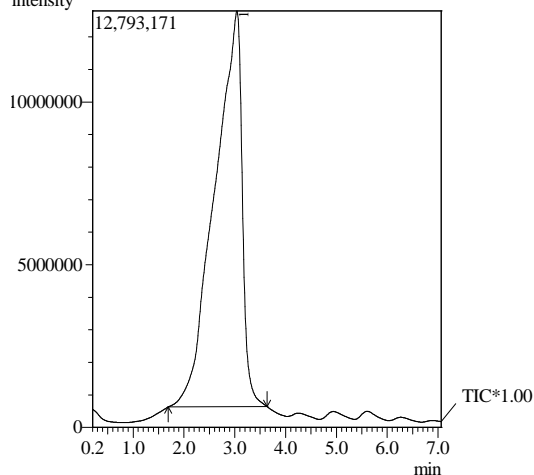

DIMS Sample Information

|                  |                                                            |
|------------------|------------------------------------------------------------|
| Data Acquired by | : Admin                                                    |
| Acquisition Date | : 4/12/2015 12:03:06 PM                                    |
| Sample Type      | : Unknown                                                  |
| Level #          | : 1                                                        |
| Sample Name      | : IB 08                                                    |
| Sample ID        | : GS41647ibrahimMalami                                     |
| IS Amount        | : [1]=1                                                    |
| Sample Amount    | : 1                                                        |
| Dilution Factor  | : 1                                                        |
| Vial #           | : 1                                                        |
| Injection Volume | : 4                                                        |
| Data File        | : C:\GCMSsolution\Data\A_AspollahSukari\3812d-a-ib08-1.qgd |
| Method File      | : D:\Data2015\A_AspollahHjSukari\DI50-A.qgm                |
| Report File      | : D:\Data2015\A_AspollahHjSukari\dipotrait.qgr             |
| Tuning File      | : C:\GCMSsolution\System\Tune1\040415Elf1zbfap.qgt         |
| Modified by      | : Admin                                                    |
| Modified         | : 4/11/2015 9:44:14 PM                                     |

#### DIMS Library

<< Target >>

Line#: 1 R.Time:3.042(Scan#:342) MassPeaks:146 BasePeak:207.05(1960392)

RawMode:Averaged 3.033-3.050(341-343) BG Mode:Calc. from Peak

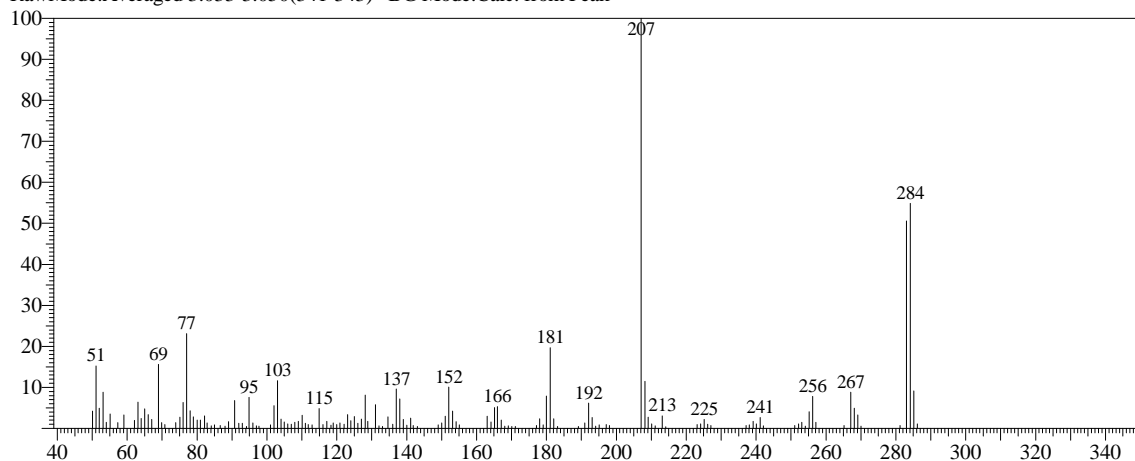

Hit#:1 Entry:100921 Library:NIST08.LIB

SI:63 Formula:C20H16N2 CAS:0-00-0 MolWeight:284 RetIndex:2648

CompName:Benzaldehyde,(diphenylmethylidene)hydrazone

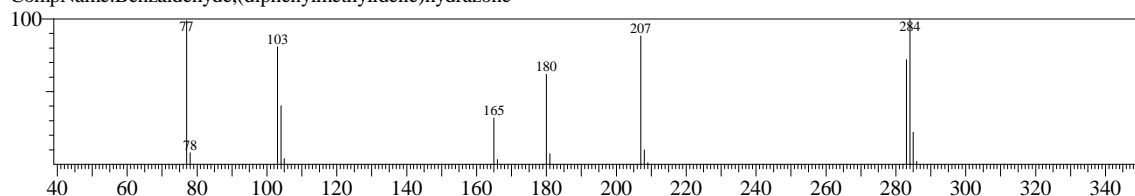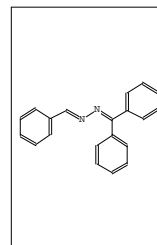

Hit#:2 Entry:113726 Library:NIST08.LIB

SI:60 Formula:C21H18O2 CAS:4376-83-4 MolWeight:302 RetIndex:2631

CompName:1-Propanone, 3-(2-hydroxyphenyl)-1,3-diphenyl- \$\$ Propiophenone, 3-(o-hydroxyphenyl)-3-phenyl- \$\$ 3-(2-Hydroxyphenyl

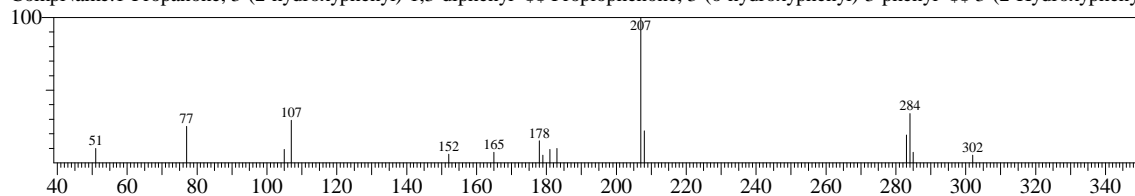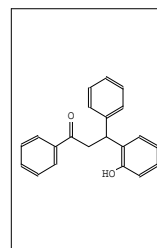

Hit#:3 Entry:100949 Library:NIST08.LIB

SI:59 Formula:C21H16O CAS:849-01-4 MolWeight:284 RetIndex:2460

CompName:Acrylophenone, 3,3-diphenyl- \$\$ Chalcone, .beta.-phenyl- \$\$ 2-Propen-1-one, 1,3,3-triphenyl- \$\$ 1,3,3-Triphenyl-2-propen-

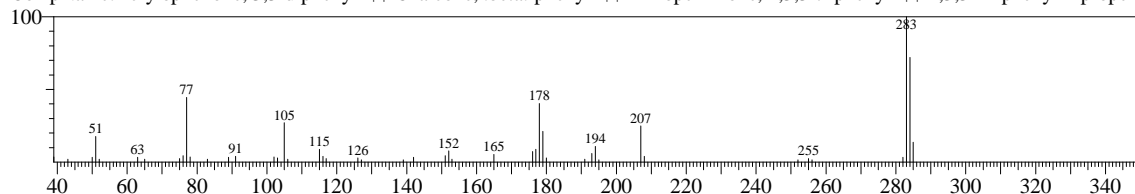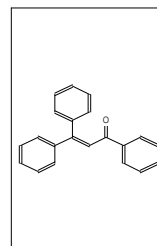

## GCMS Mass Table

Line#1 R.Time:3.0(Scan#:342)

MassPeaks:146 BasePeak:207(1960392)

RawMode:Averaged 3.0-3.1(341-343)

BG Mode:Calc. from Peak

| #  | m/z    | Abs. Int. | Rel. Int. | #  | m/z    | Abs. Int. | Rel. Int. | #   | m/z    | Abs. Int. | Rel. Int. |
|----|--------|-----------|-----------|----|--------|-----------|-----------|-----|--------|-----------|-----------|
| 1  | 50.05  | 82506     | 4.21      | 50 | 110.05 | 62893     | 3.21      | 99  | 179.10 | 17287     | 0.88      |
| 2  | 51.10  | 298380    | 15.22     | 51 | 111.00 | 24802     | 1.27      | 100 | 179.95 | 154067    | 7.86      |
| 3  | 52.05  | 96392     | 4.92      | 52 | 111.85 | 19107     | 0.97      | 101 | 181.10 | 385705    | 19.67     |
| 4  | 53.10  | 173461    | 8.85      | 53 | 112.90 | 16541     | 0.84      | 102 | 182.10 | 45449     | 2.32      |
| 5  | 54.05  | 29086     | 1.48      | 54 | 114.95 | 94367     | 4.81      | 103 | 183.20 | 9932      | 0.51      |
| 6  | 55.10  | 68412     | 3.49      | 55 | 116.05 | 17704     | 0.90      | 104 | 189.10 | 8701      | 0.44      |
| 7  | 57.30  | 27549     | 1.41      | 56 | 117.10 | 33036     | 1.69      | 105 | 191.00 | 25670     | 1.31      |
| 8  | 59.05  | 63698     | 3.25      | 57 | 118.35 | 14856     | 0.76      | 106 | 192.10 | 121039    | 6.17      |
| 9  | 62.05  | 37587     | 1.92      | 58 | 119.00 | 25430     | 1.30      | 107 | 193.10 | 52505     | 2.68      |
| 10 | 63.05  | 126169    | 6.44      | 59 | 119.95 | 18570     | 0.95      | 108 | 194.10 | 11469     | 0.59      |
| 11 | 64.05  | 47525     | 2.42      | 60 | 120.90 | 26295     | 1.34      | 109 | 195.05 | 17019     | 0.87      |
| 12 | 65.05  | 92718     | 4.73      | 61 | 122.05 | 19134     | 0.98      | 110 | 197.10 | 19007     | 0.97      |
| 13 | 66.00  | 65593     | 3.35      | 62 | 123.05 | 65100     | 3.32      | 111 | 198.05 | 13732     | 0.70      |
| 14 | 67.05  | 42251     | 2.16      | 63 | 124.05 | 36166     | 1.84      | 112 | 207.05 | 1960392   | 100.00    |
| 15 | 69.00  | 305638    | 15.59     | 64 | 125.05 | 56834     | 2.90      | 113 | 208.15 | 225334    | 11.49     |
| 16 | 69.90  | 28122     | 1.43      | 65 | 126.00 | 24978     | 1.27      | 114 | 209.15 | 53063     | 2.71      |
| 17 | 70.75  | 17860     | 0.91      | 66 | 127.00 | 43908     | 2.24      | 115 | 210.15 | 21393     | 1.09      |
| 18 | 73.90  | 27263     | 1.39      | 67 | 128.10 | 158457    | 8.08      | 116 | 211.15 | 12997     | 0.66      |
| 19 | 75.05  | 53113     | 2.71      | 68 | 128.85 | 33295     | 1.70      | 117 | 213.10 | 59740     | 3.05      |
| 20 | 76.05  | 124382    | 6.34      | 69 | 131.05 | 113479    | 5.79      | 118 | 214.15 | 8181      | 0.42      |
| 21 | 77.00  | 452349    | 23.07     | 70 | 132.10 | 12848     | 0.66      | 119 | 223.15 | 17961     | 0.92      |
| 22 | 78.00  | 83968     | 4.28      | 71 | 133.05 | 9402      | 0.48      | 120 | 224.15 | 21881     | 1.12      |
| 23 | 78.95  | 54852     | 2.80      | 72 | 134.65 | 54546     | 2.78      | 121 | 225.10 | 42474     | 2.17      |
| 24 | 80.00  | 39401     | 2.01      | 73 | 136.00 | 19283     | 0.98      | 122 | 226.10 | 19780     | 1.01      |
| 25 | 81.00  | 40317     | 2.06      | 74 | 137.00 | 188595    | 9.62      | 123 | 227.10 | 14110     | 0.72      |
| 26 | 82.10  | 58982     | 3.01      | 75 | 138.00 | 140874    | 7.19      | 124 | 237.15 | 14007     | 0.71      |
| 27 | 82.85  | 25572     | 1.30      | 76 | 139.00 | 42764     | 2.18      | 125 | 238.05 | 16550     | 0.84      |
| 28 | 84.05  | 11711     | 0.60      | 77 | 140.05 | 14762     | 0.75      | 126 | 239.15 | 32915     | 1.68      |
| 29 | 85.00  | 16236     | 0.83      | 78 | 141.10 | 48745     | 2.49      | 127 | 240.10 | 21116     | 1.08      |
| 30 | 86.60  | 13949     | 0.71      | 79 | 141.90 | 14170     | 0.72      | 128 | 241.15 | 52145     | 2.66      |
| 31 | 88.00  | 10510     | 0.54      | 80 | 143.10 | 9163      | 0.47      | 129 | 242.10 | 11664     | 0.59      |
| 32 | 89.00  | 31644     | 1.61      | 81 | 149.05 | 16378     | 0.84      | 130 | 251.05 | 14499     | 0.74      |
| 33 | 90.80  | 133053    | 6.79      | 82 | 150.00 | 25789     | 1.32      | 131 | 252.15 | 21917     | 1.12      |
| 34 | 91.95  | 24067     | 1.23      | 83 | 151.00 | 58696     | 2.99      | 132 | 253.10 | 28901     | 1.47      |
| 35 | 92.95  | 24049     | 1.23      | 84 | 152.05 | 196849    | 10.04     | 133 | 254.10 | 11376     | 0.58      |
| 36 | 94.10  | 8426      | 0.43      | 85 | 153.10 | 82420     | 4.20      | 134 | 255.15 | 79976     | 4.08      |
| 37 | 94.85  | 148407    | 7.57      | 86 | 154.10 | 32026     | 1.63      | 135 | 256.15 | 153216    | 7.82      |
| 38 | 96.00  | 26655     | 1.36      | 87 | 155.05 | 17293     | 0.88      | 136 | 257.10 | 29628     | 1.51      |
| 39 | 96.95  | 11664     | 0.59      | 88 | 163.00 | 58084     | 2.96      | 137 | 265.15 | 13068     | 0.67      |
| 40 | 97.70  | 10700     | 0.55      | 89 | 164.10 | 30200     | 1.54      | 138 | 267.10 | 172768    | 8.81      |
| 41 | 101.00 | 16529     | 0.84      | 90 | 165.10 | 98781     | 5.04      | 139 | 268.10 | 96324     | 4.91      |
| 42 | 102.05 | 108602    | 5.54      | 91 | 165.95 | 104157    | 5.31      | 140 | 269.10 | 65039     | 3.32      |
| 43 | 103.05 | 228086    | 11.63     | 92 | 167.05 | 39724     | 2.03      | 141 | 270.00 | 10174     | 0.52      |
| 44 | 104.05 | 44852     | 2.29      | 93 | 168.05 | 10362     | 0.53      | 142 | 281.20 | 13386     | 0.68      |
| 45 | 105.00 | 29924     | 1.53      | 94 | 169.10 | 12619     | 0.64      | 143 | 283.05 | 991696    | 50.59     |
| 46 | 106.00 | 21114     | 1.08      | 95 | 170.10 | 9661      | 0.49      | 144 | 284.10 | 1076371   | 54.91     |
| 47 | 106.95 | 19575     | 1.00      | 96 | 171.05 | 9439      | 0.48      | 145 | 285.15 | 179097    | 9.14      |
| 48 | 108.00 | 29800     | 1.52      | 97 | 177.15 | 14043     | 0.72      | 146 | 286.15 | 22113     | 1.13      |
| 49 | 109.00 | 34422     | 1.76      | 98 | 178.05 | 46147     | 2.35      |     |        |           |           |

nt IB 08 C:\GCMSsolution\Data\A\_AspollahSukari\3812c

Group #1

intensity

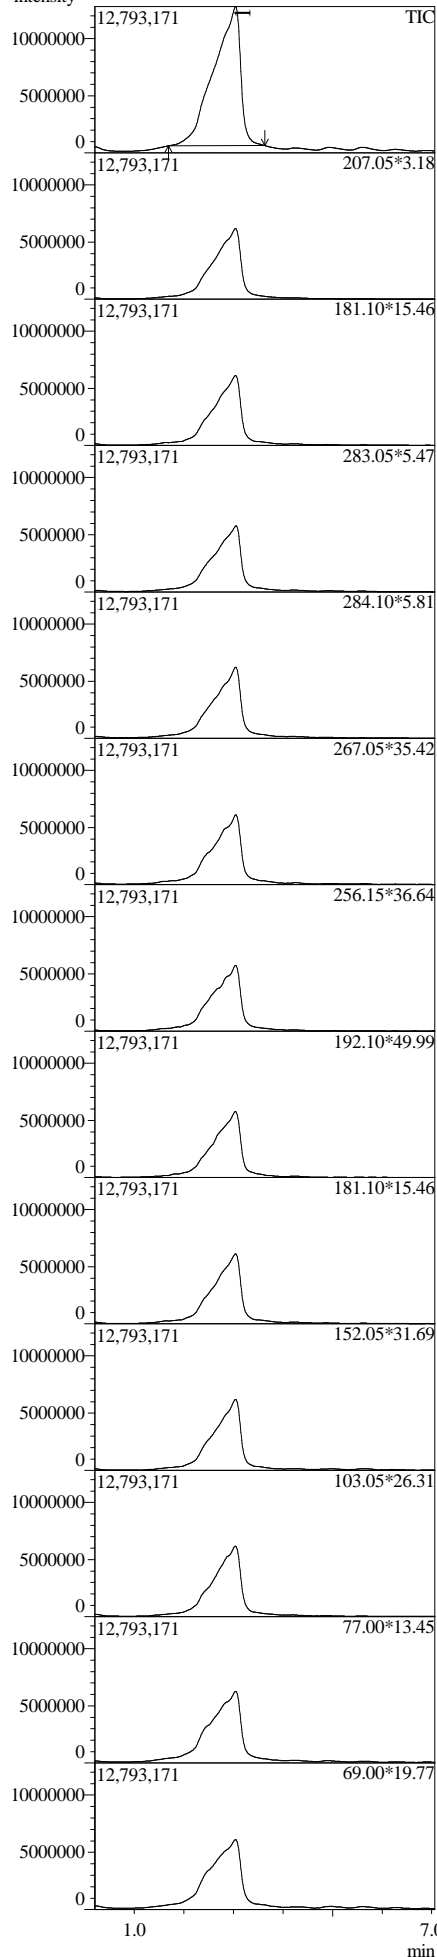

Supplement: s1 [file s1]
