# Supplementary material for: In Silico Discovery of Potential Uridine-Cytidine Kinase 2 Inhibitors from the Rhizome of Alpinia mutica
Source: MDPI journal article supplement (doi:10.3390/molecules21040417), 2016-04-08

Sample Name : IB 17  
Sample ID : GS41647ibrahimMalami

DIMS Sample Information

Data Acquired by : Admin  
Acquisition Date : 1/12/2016 11:14:46 AM  
Data File : C:\GCMSsolution\Data\KR\_kartineeKassim\4029d-kr-IB17-1.qgd  
Method File : C:\GCMSsolution\Data\KR\_KartineeKassim\DI2010-T.qgm  
Report File : DIpotrait1.qgr  
Tuning File : C:\GCMSsolution\System\Tune1\090116Elf1zb5ms.qgt  
Modified by : Admin  
Modified : 1/12/2016 11:46:52 AM

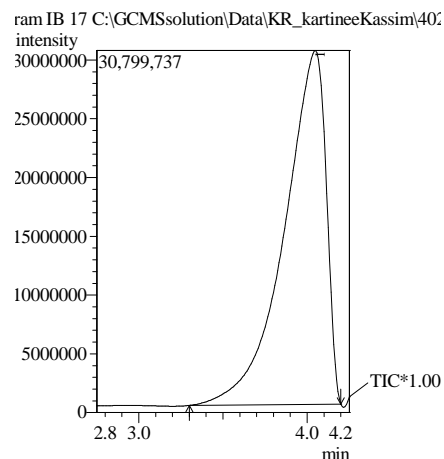

DIMS Library

<< Target >>

Line#:1 R.Time:4.050(Scan#:463) MassPeaks:101 BasePeak:166.05(6612121)  
RawMode:Averaged 4.042-4.058(462-464) BG Mode:Calc. from Peak

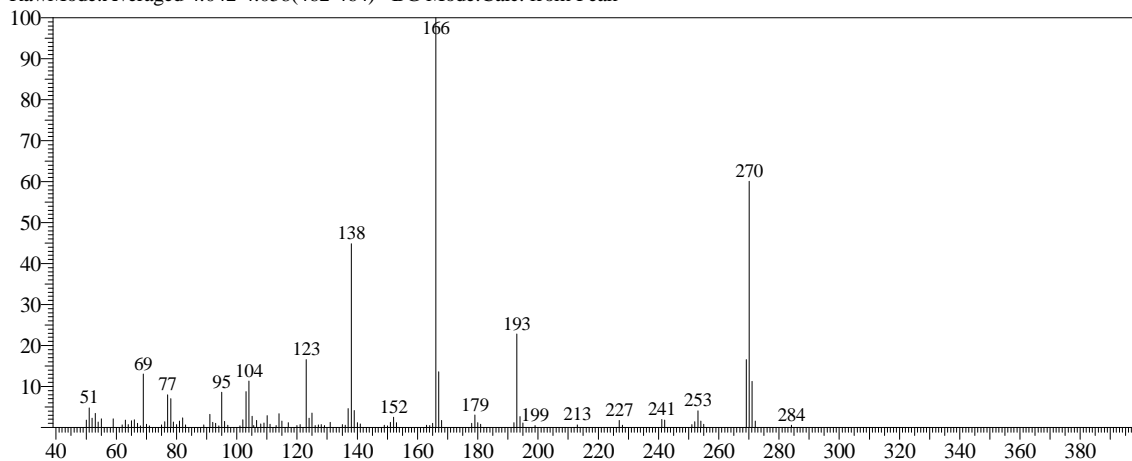

Hit#:1 Entry:90499 Library:NIST08.LIB

SI:81 Formula:C16H14O4 CAS:28143-82-0 MolWeight:270 RetIndex:2440

CompName:2-Propen-1-one, 1-(2,4-dihydroxy-5-methoxyphenyl)-3-phenyl-, (E)- \$\$ Chalcone, 2',4'-dihydroxy-5'-methoxy- \$\$ Flemi c

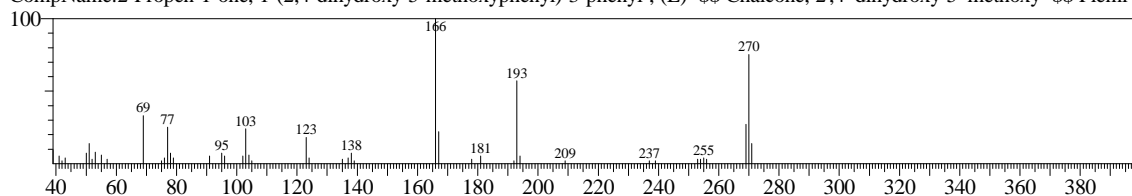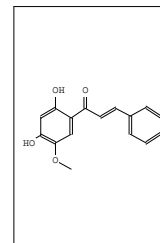

Hit#:2 Entry:90506 Library:NIST08.LIB

SI:77 Formula:C16H14O4 CAS:18956-15-5 MolWeight:270 RetIndex:2440

CompName:2-Propen-1-one, 1-(2,6-dihydroxy-4-methoxyphenyl)-3-phenyl-, (E)- \$\$ Chalcone, 2',6'-dihydroxy-4'-methoxy- \$\$ Pinostr

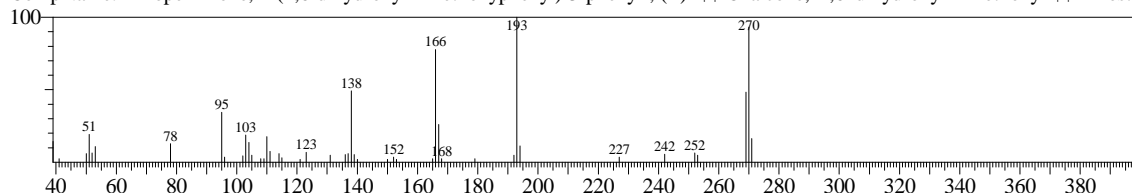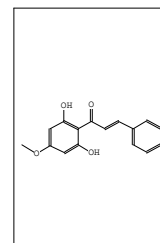

Hit#:3 Entry:90661 Library:NIST08.LIB

SI:66 Formula:C17H18O3 CAS:55670-26-3 MolWeight:270 RetIndex:2313

CompName:2H-1-Benzopyran-7-ol, 3,4-dihydro-5-methoxy-6-methyl-2-phenyl- \$\$ 5-Methoxy-6-methyl-2-phenyl-7-chromanol # \$\$

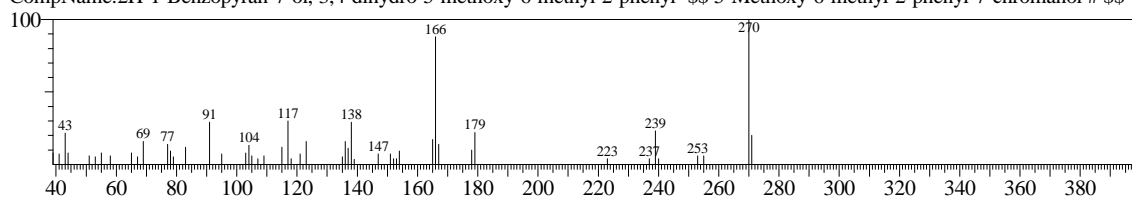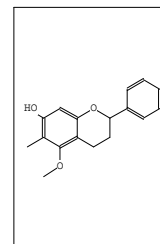

## GCMS Mass Table

Line#:1 R.Time:4.0(Scan#:463)

MassPeaks:101 BasePeak:166(6612121)

RawMode:Averaged 4.0-4.1(462-464)

BG Mode:Calc. from Peak

| #  | m/z   | Abs. Int. | Rel. Int. | #  | m/z    | Abs. Int. | Rel. Int. | #  | m/z    | Abs. Int. | Rel. Int. |
|----|-------|-----------|-----------|----|--------|-----------|-----------|----|--------|-----------|-----------|
| 1  | 50.00 | 118826    | 1.80      | 35 | 101.05 | 27635     | 0.42      | 69 | 151.00 | 82040     | 1.24      |
| 2  | 51.00 | 317673    | 4.80      | 36 | 102.05 | 122474    | 1.85      | 70 | 152.00 | 163423    | 2.47      |
| 3  | 52.00 | 147263    | 2.23      | 37 | 103.05 | 577505    | 8.73      | 71 | 153.05 | 78020     | 1.18      |
| 4  | 53.00 | 225280    | 3.41      | 38 | 104.05 | 749951    | 11.34     | 72 | 163.00 | 37332     | 0.56      |
| 5  | 54.00 | 86818     | 1.31      | 39 | 105.05 | 180664    | 2.73      | 73 | 164.05 | 28530     | 0.43      |
| 6  | 55.00 | 140749    | 2.13      | 40 | 105.60 | 30103     | 0.46      | 74 | 165.05 | 64636     | 0.98      |
| 7  | 59.00 | 137947    | 2.09      | 41 | 106.60 | 114605    | 1.73      | 75 | 166.05 | 6612121   | 100.00    |
| 8  | 62.00 | 39048     | 0.59      | 42 | 108.00 | 55384     | 0.84      | 76 | 167.00 | 897728    | 13.58     |
| 9  | 63.00 | 119470    | 1.81      | 43 | 109.00 | 72702     | 1.10      | 77 | 168.00 | 115112    | 1.74      |
| 10 | 64.00 | 48833     | 0.74      | 44 | 110.05 | 190648    | 2.88      | 78 | 178.00 | 67616     | 1.02      |
| 11 | 65.00 | 106369    | 1.61      | 45 | 111.05 | 52011     | 0.79      | 79 | 179.00 | 202129    | 3.06      |
| 12 | 66.00 | 125330    | 1.90      | 46 | 113.05 | 32238     | 0.49      | 80 | 180.00 | 78257     | 1.18      |
| 13 | 67.00 | 68438     | 1.04      | 47 | 114.05 | 223832    | 3.39      | 81 | 181.00 | 52914     | 0.80      |
| 14 | 68.05 | 27298     | 0.41      | 48 | 115.00 | 104377    | 1.58      | 82 | 192.00 | 77831     | 1.18      |
| 15 | 69.00 | 863679    | 13.06     | 49 | 117.05 | 79440     | 1.20      | 83 | 193.00 | 1510411   | 22.84     |
| 16 | 70.00 | 49436     | 0.75      | 50 | 120.00 | 30018     | 0.45      | 84 | 194.00 | 178177    | 2.69      |
| 17 | 71.00 | 27471     | 0.42      | 51 | 121.00 | 46810     | 0.71      | 85 | 195.00 | 71766     | 1.09      |
| 18 | 75.00 | 39257     | 0.59      | 52 | 123.00 | 1095880   | 16.57     | 86 | 199.00 | 28622     | 0.43      |
| 19 | 76.05 | 91406     | 1.38      | 53 | 124.00 | 150282    | 2.27      | 87 | 213.00 | 40332     | 0.61      |
| 20 | 77.00 | 528326    | 7.99      | 54 | 125.00 | 233254    | 3.53      | 88 | 227.00 | 114552    | 1.73      |
| 21 | 78.05 | 463403    | 7.01      | 55 | 126.05 | 31354     | 0.47      | 89 | 228.05 | 34049     | 0.51      |
| 22 | 79.00 | 85833     | 1.30      | 56 | 127.05 | 38801     | 0.59      | 90 | 241.05 | 131510    | 1.99      |
| 23 | 80.00 | 44636     | 0.68      | 57 | 128.05 | 48114     | 0.73      | 91 | 242.05 | 117594    | 1.78      |
| 24 | 81.00 | 102542    | 1.55      | 58 | 129.05 | 29042     | 0.44      | 92 | 251.05 | 48384     | 0.73      |
| 25 | 82.05 | 153286    | 2.32      | 59 | 131.05 | 82264     | 1.24      | 93 | 252.05 | 92607     | 1.40      |
| 26 | 82.95 | 39777     | 0.60      | 60 | 135.00 | 48803     | 0.74      | 94 | 253.05 | 266495    | 4.03      |
| 27 | 89.00 | 43005     | 0.65      | 61 | 136.00 | 34269     | 0.52      | 95 | 254.05 | 104510    | 1.58      |
| 28 | 91.05 | 210985    | 3.19      | 62 | 137.00 | 305505    | 4.62      | 96 | 255.05 | 53937     | 0.82      |
| 29 | 92.05 | 82742     | 1.25      | 63 | 138.05 | 2963225   | 44.82     | 97 | 269.10 | 1093182   | 16.53     |
| 30 | 93.00 | 66019     | 1.00      | 64 | 139.00 | 275922    | 4.17      | 98 | 270.10 | 3972119   | 60.07     |
| 31 | 94.05 | 27668     | 0.42      | 65 | 140.05 | 78822     | 1.19      | 99 | 271.10 | 745937    | 11.28     |
| 32 | 95.00 | 568392    | 8.60      | 66 | 141.05 | 55932     | 0.85      | 00 | 272.10 | 101672    | 1.54      |
| 33 | 96.00 | 95634     | 1.45      | 67 | 149.00 | 36782     | 0.56      | 01 | 284.15 | 34538     | 0.52      |
| 34 | 97.00 | 35533     | 0.54      | 68 | 150.00 | 26607     | 0.40      |    |        |           |           |

t IB 17 C:\GCMSsolution\Data\KR\_kartineeKassim\4029c

Group #1

30,799,737

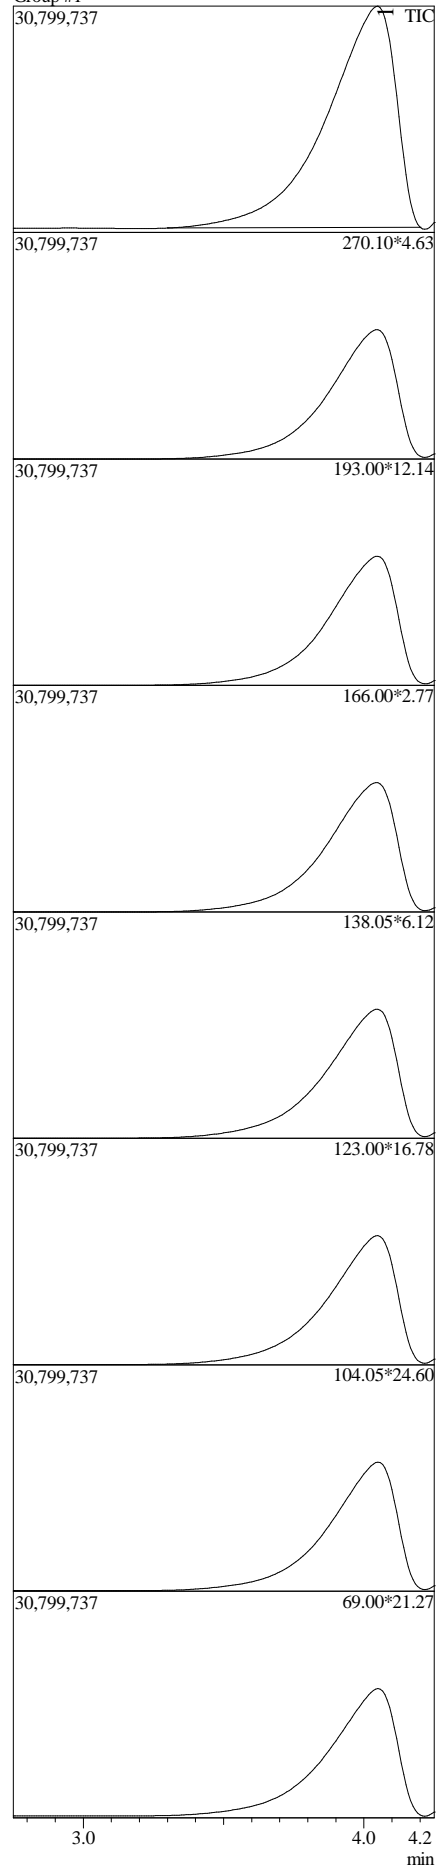

Supplement: s1 [file s1]
