# Supplementary material for: In Silico Discovery of Potential Uridine-Cytidine Kinase 2 Inhibitors from the Rhizome of Alpinia mutica
Source: MDPI journal article supplement (doi:10.3390/molecules21040417), 2016-04-08

|                               |                                                         |                             |                                           |                                      |
|-------------------------------|---------------------------------------------------------|-----------------------------|-------------------------------------------|--------------------------------------|
| <b>Acquisition Time (sec)</b> | 2.0447                                                  | <b>Comment</b>              | IB17 Ibrahim / Dr ahmad Bustamam in CDCl3 |                                      |
| <b>Date</b>                   | Jan 15 2016                                             | <b>Date Stamp</b>           | Jan 15 2016                               |                                      |
| <b>File Name</b>              | C:\Users\dfgdf\Desktop\NMR spec\ibrahim ib17 1h.fid\fid | <b>Frequency (MHz)</b>      | 499.90                                    |                                      |
| <b>Nucleus</b>                | 1H                                                      | <b>Number of Transients</b> | 16                                        | <b>Original Points Count</b> 16384   |
| <b>Points Count</b>           | 32768                                                   | <b>Pulse Sequence</b>       | s2pul                                     | <b>Receiver Gain</b> 22.00           |
| <b>Solvent</b>                | CHLOROFORM-d                                            | <b>Spectrum Offset (Hz)</b> | 3005.2056                                 |                                      |
| <b>Spectrum Type</b>          | STANDARD                                                | <b>Sweep Width (Hz)</b>     | 8012.82                                   | <b>Temperature (degree C)</b> 25.000 |

IB17.esp

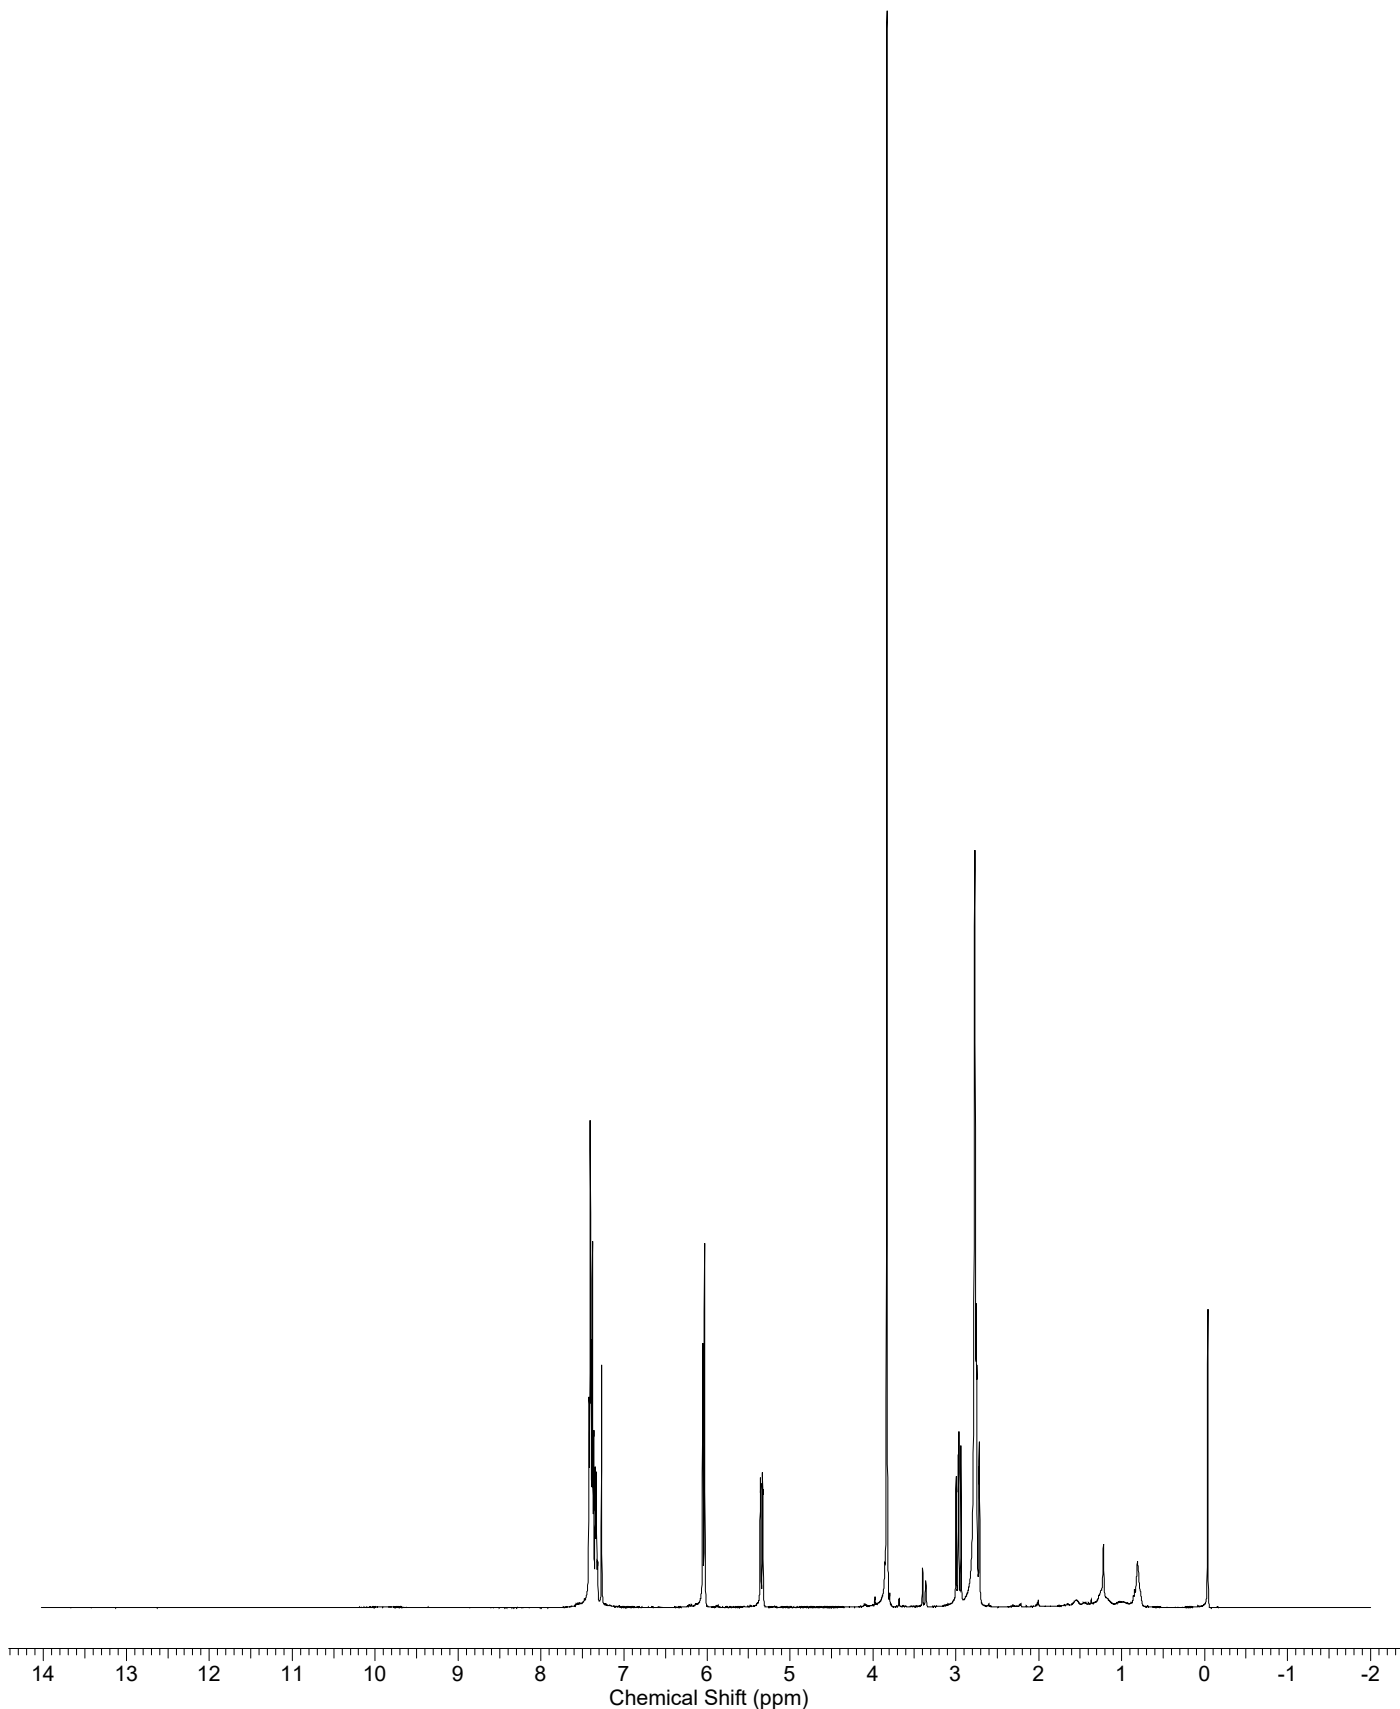

Supplement: s1 [file s1]
