# Supplementary material for: In Silico Discovery of Potential Uridine-Cytidine Kinase 2 Inhibitors from the Rhizome of Alpinia mutica
Source: MDPI journal article supplement (doi:10.3390/molecules21040417), 2016-04-08

|                               |                                                                      |                      |                                           |                                  |
|-------------------------------|----------------------------------------------------------------------|----------------------|-------------------------------------------|----------------------------------|
| <b>Acquisition Time (sec)</b> | 1.0224                                                               | <b>Comment</b>       | IB17 Ibrahim / Dr ahmad Bustamam in CDCl3 |                                  |
| <b>Date</b>                   | Jan 29 2016                                                          | <b>Date Stamp</b>    | Jan 29 2016                               |                                  |
| <b>File Name</b>              | C:\Users\dfgdf\Desktop\NMR spec\ibrahim-13c\ibrahim_ib17_13c.fid\fid |                      |                                           |                                  |
| <b>Frequency (MHz)</b>        | 125.71                                                               | <b>Nucleus</b>       | 13C                                       | <b>Number of Transients</b> 1216 |
| <b>Original Points Count</b>  | 32768                                                                | <b>Points Count</b>  | 65536                                     | <b>Pulse Sequence</b> s2pul      |
| <b>Receiver Gain</b>          | 54.00                                                                | <b>Solvent</b>       | CHLOROFORM-d                              |                                  |
| <b>Spectrum Offset (Hz)</b>   | 13826.9531                                                           | <b>Spectrum Type</b> | STANDARD                                  | <b>Sweep Width (Hz)</b> 32051.28 |
| <b>Temperature (degree C)</b> | 25.000                                                               |                      |                                           |                                  |

ibrahim\_ib17\_13c

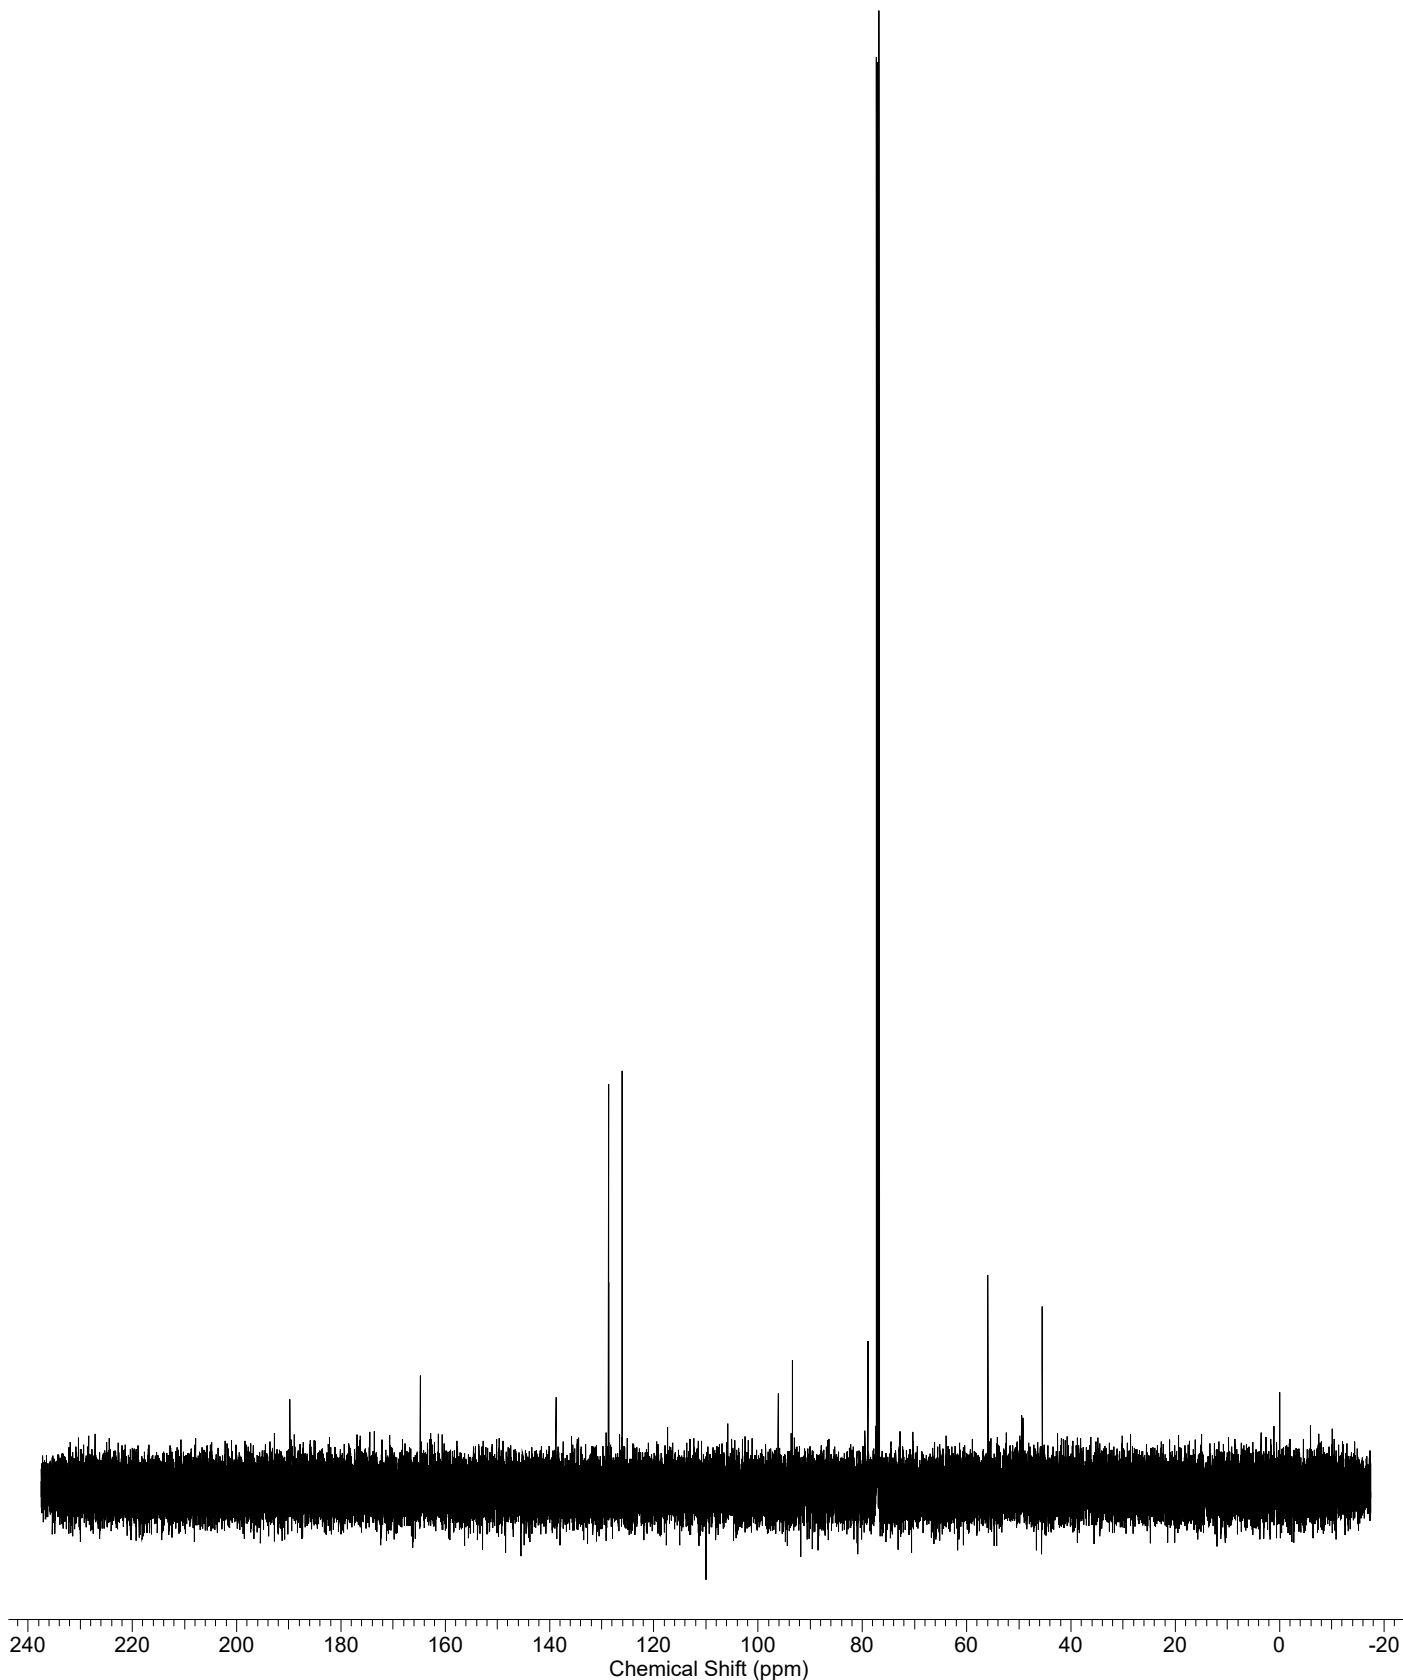

Supplement: s1 [file s1]
